# Supplementary material for: Expression of the p16INK4A Gene Is Associated Closely with Senescence of Human Mesenchymal Stem Cells and Is Potentially Silenced by DNA Methylation During In Vitro Expansion
Source: Oxford University Press journal article supplement (doi:10.1634/stemcells.2007-0225), 2007-06-14
Supplement: stmcls_25_9_2371_s4.pdf [file stmcls_25_9_2371_s4.pdf]

Supplementary Table 1. Donor population

| Donor ID. | Age  | Gender | Final PD | Culture Period (days) | Telomere         |                 |                       | p16 gene           |                          |
|-----------|------|--------|----------|-----------------------|------------------|-----------------|-----------------------|--------------------|--------------------------|
|           |      |        |          |                       | Early mTRFL (kb) | Late mTRFL (kb) | Shortening ratio (bp) | Group <sup>a</sup> | Methylation <sup>b</sup> |
| hMSC08    | 67   | F      | 25       | 164                   | 6.7              | 6.5             | 30                    | GI                 | ND                       |
| hMSC09    | 66   | M      | 29       | 175                   | 10.8             | 8.1             | 150                   | GI                 | ND                       |
| hMSC15    | 42   | M      | 27       | 117                   | 9.4              | 7.1             | 120                   | GI                 | ND                       |
| hMSC16    | 63   | F      | 18       | 132                   | 8.5              | 7.1             | 200                   | GI                 | -                        |
| hMSC18    | 49   | F      | 26       | 116                   | 7.8              | 6.4             | 90                    | GI                 | ND                       |
| hMSC19    | 20   | M      | 31       | 147                   | 9.9              | 7.2             | 120                   | GI                 | ND                       |
| hMSC21    | 57   | M      | 22       | 123                   | 9.9              | 8.4             | 120                   | GI                 | ND                       |
| hMSC22    | 65   | M      | 27       | 113                   | 9.2              | 7.1             | 110                   | GI                 | ND                       |
| hMSC23    | 29   | F      | 29       | 151                   | 9.9              | 7.2             | 160                   | GI                 | ND                       |
| hMSC25    | 66   | M      | 27       | 149                   | 8.5              | 7.4             | 50                    | GI                 | ND                       |
| hMSC28    | 28   | M      | 28       | 117                   | 10.0             | 7.4             | 170                   | GI                 | -                        |
| hMSC29    | 51   | F      | 25       | 132                   | 10.1             | 8.0             | 140                   | GI                 | -                        |
| hMSC34    | 77   | F      | 27       | 159                   | 9.9              | 8.8             | 60                    | GI                 | -                        |
| hMSC35    | 69   | F      | 27       | 153                   | 9.8              | 7.2             | 140                   | GI                 | -                        |
| hMSC36    | 44   | M      | 28       | 180                   | 9.1              | 7.8             | 70                    | GI                 | -                        |
| hMSC37    | 42   | F      | 37       | 240                   | 10.9             | 7.6             | 120                   | GI                 | -                        |
| hMSC38    | 84   | M      | 13       | 125                   | 8.3              | 8.0             | 50                    | GI                 | -                        |
| hMSC39    | 19   | M      | 35       | 181                   | 9.8              | 7.6             | 100                   | GI                 | -                        |
| hMSC40    | 18   | M      | 39       | 199                   | 8.9              | 7.3             | 60                    | GI                 | -                        |
| hMSC41    | 70   | M      | 25       | 145                   | 9.3              | 8.5             | 60                    | GI                 | -                        |
| hMSC42    | 29   | F      | 30       | 167                   | 9.9              | 7.5             | 110                   | GI                 | -                        |
| hMSC43    | 58   | F      | 30       | 112                   | 9.4              | 7.8             | 80                    | GI                 | ND                       |
| hMSC44    | 74   | F      | 18       | 100                   | 7.1              | 6.7             | 200                   | GI                 | ND                       |
| hMSC45    | 53   | M      | 29       | 111                   | 9.4              | 7.1             | 100                   | GI                 | ND                       |
| hMSC46    | 71   | F      | 24       | 90                    | 8.8              | 6.9             | 100                   | GI                 | ND                       |
| hMSC14    | 17   | F      | 33       | 147                   | 9.5              | 7.6             | 110                   | IR                 | +                        |
| hMSC17    | 24   | F      | 54       | 334                   | 11.5             | 6.9             | 130                   | IR                 | +                        |
| hMSC10    | 74   | F      | 28       | 138                   | 10.3             | 8.5             | 100                   | NI                 | +                        |
| hMSC24    | 10   | F      | 27       | 170                   | 9.0              | 7.1             | 100                   | NI                 | +                        |
| Average   | 49.1 |        | 28.1     | 151.2                 | 9.4              | 7.5             | 109                   |                    |                          |
| Stdev     | 21.8 |        | 7.2      | 47.7                  | 1.0              | 0.6             | 43                    |                    |                          |
